# Supplementary material
Source: Springer Nature journal article supplement (https://www.springermedizin.de/resource/supplementary/12943_2010_807_MOESM6_ESM.pdf/9554882)

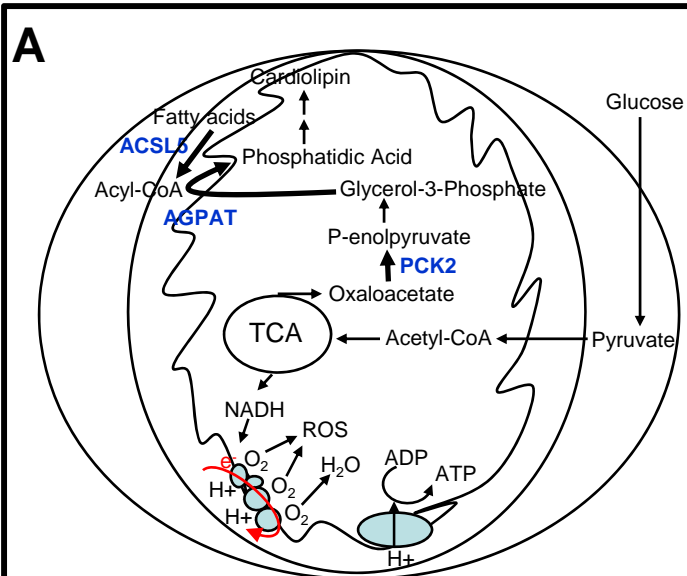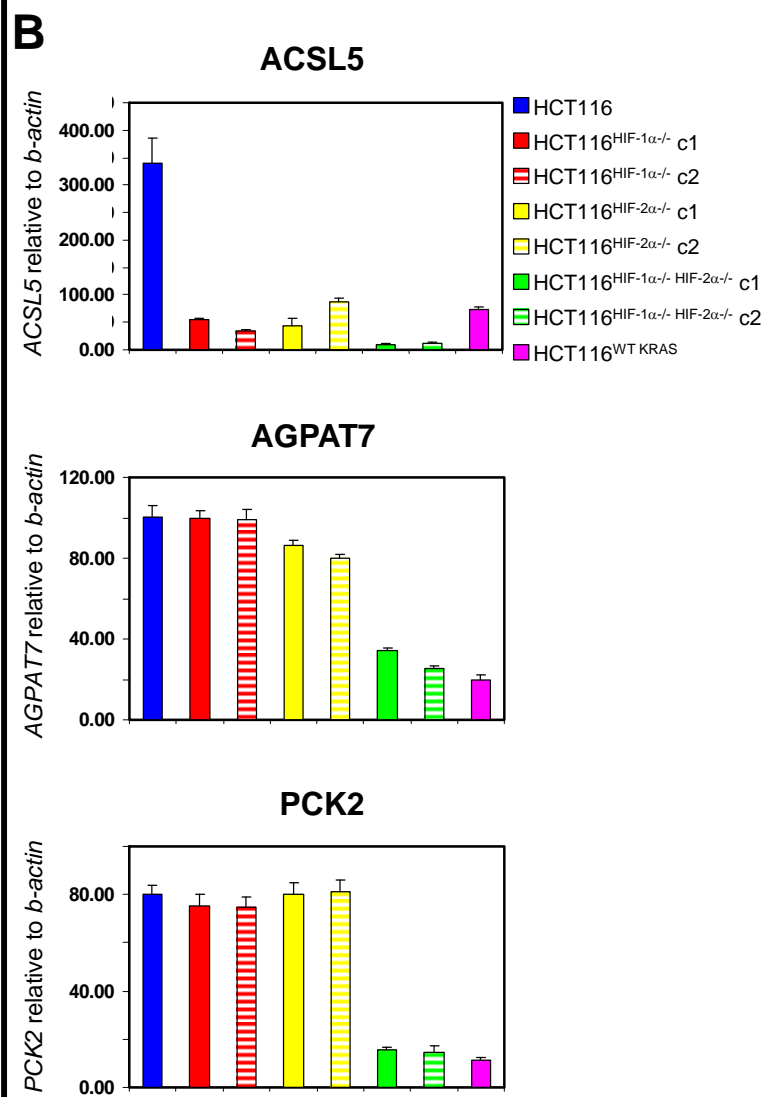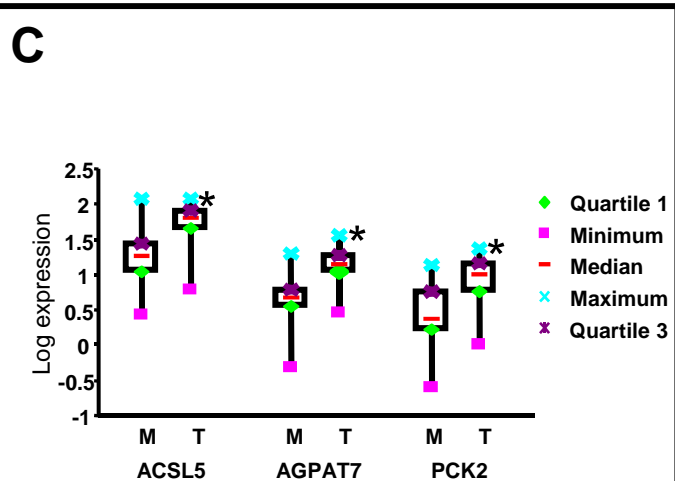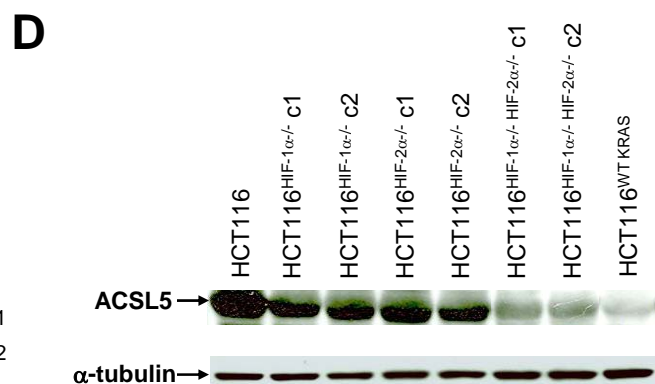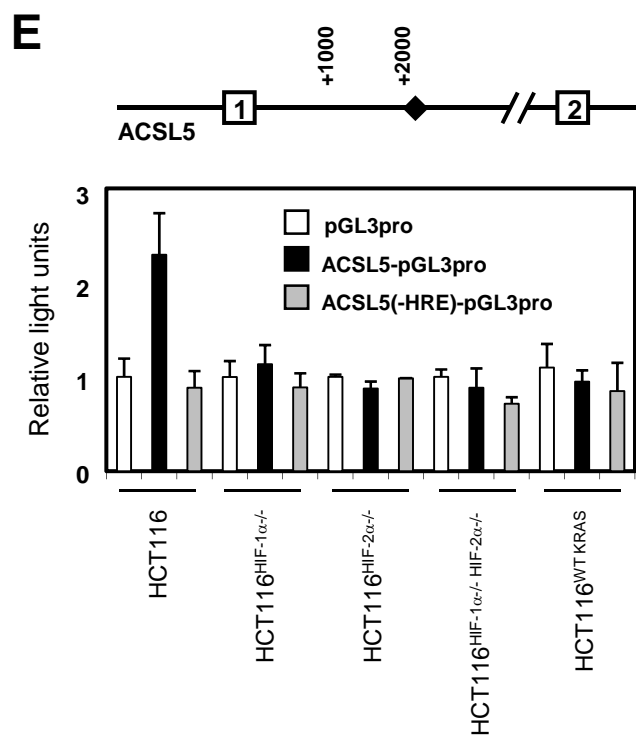

Supplement: MOESM6 [file 9554882]
